# Supplementary material
Source: PubMed Central journal article supplement (PMC420468)
Supplement: 1471-2407-4-22-S1.pdf [file 1471-2407-4-22-S1.pdf]

## Seeing the Doctor and Getting Chemotherapy

Have you ever come to clinic when you saw an oncologist and got chemotherapy at the same visit? Yes or No (circle one)

If yes, please complete the following.

| Activities                                                                                                                                                                                                                                                                                                                                                       | Time<br>(Minutes) |
|------------------------------------------------------------------------------------------------------------------------------------------------------------------------------------------------------------------------------------------------------------------------------------------------------------------------------------------------------------------|-------------------|
| <i>The following activities are associated with getting ready for the appointment, going to the appointment, being at the appointment, and traveling from the appointment. Please indicate the amount of time it took for each of the following activities the <u>last time</u> you came to see an oncologist and got a chemotherapy treatment the same day.</i> |                   |
| Getting ready for the appointment                                                                                                                                                                                                                                                                                                                                |                   |
| Travel to the medical office                                                                                                                                                                                                                                                                                                                                     |                   |
| Time at the medical office seeing the doctor and receiving chemotherapy (estimate the time from when you walked in to the time you left)                                                                                                                                                                                                                         |                   |
| Travel to home, work, or other destination following your treatment.                                                                                                                                                                                                                                                                                             |                   |
| <i>During the time you described above, please list the activities you would normally have done had you not have had to go the appointment.</i>                                                                                                                                                                                                                  |                   |
| Activity:                                                                                                                                                                                                                                                                                                                                                        |                   |
| Activity:                                                                                                                                                                                                                                                                                                                                                        |                   |
| Activity:                                                                                                                                                                                                                                                                                                                                                        |                   |
| Activity:                                                                                                                                                                                                                                                                                                                                                        |                   |
| <i>After your appointment, please indicate the time of any other activities that you missed, rescheduled, canceled, or did not plan to do because you had to see the doctor and get a chemotherapy treatment. Please list below and indicate the time associated with each activity.</i>                                                                         |                   |
| Activity:                                                                                                                                                                                                                                                                                                                                                        |                   |
| Activity:                                                                                                                                                                                                                                                                                                                                                        |                   |
| Activity:                                                                                                                                                                                                                                                                                                                                                        |                   |
| Activity:                                                                                                                                                                                                                                                                                                                                                        |                   |
